# Supplementary material
Source: PubMed Central journal article supplement (PMC9391286)
Supplement: NIHMS1818560-supplement-1.pdf [file NIHMS1818560-supplement-1.pdf]

(((((("Mandible"[MeSH] OR "Mandibular Neoplasms"[Mesh] OR "Mandibular Osteotomy"[Mesh] OR mandible[tiab] OR mandibles[tiab] OR mandibular[tiab] OR oromandibular[tiab] OR jaw[tiab] OR jaws[tiab] OR jawbone[tiab] OR mandibulectomy[tiab] OR mandibulectomies[tiab]) AND ("Mandibular Reconstruction"[MeSH] OR "Reconstructive Surgical Procedures"[Mesh:NoExp] OR reconstruction[tiab] OR reconstructions[tiab] OR reconstructive[tiab]) AND ("Bone Plates"[Mesh] OR "Fibula"[MeSH] OR plate[tiab] OR plates[tiab] OR miniplate[tiab] OR miniplates[tiab] OR fibula[tiab] OR fibular[tiab]))) NOT ("Animals"[MeSH] NOT "Humans"[MeSH]))) NOT ("editorial"[Publication Type] OR "letter"[Publication Type]) AND (English[lang])
